# Supplementary material for: A genome-wide microRNA screen identifies regulators of tetraploid cell proliferation
Source: PubMed Central journal article supplement — Mol Biol Cell. 2018 Jul 15;29(14):1682–92. doi: 10.1091/mbc.E18-02-0141 (PMC6080710; doi:10.1091/mbc.e18-02-0141), 2018-07-15

# Supplemental Materials

*Molecular Biology of the Cell*

Vittoria et al.

**Supplemental Figure 1:** (A) Percent of tetraploids that enter mitosis, as judged by live-cell imaging, after treatment with the indicated siRNA/miRNA (n=number of cells tracked over three independent experiments, \*\*  $p < 0.01$ , \*\*\*\*  $p < 0.0001$ , ns = non-significant, one-way ANOVA).(B) The fates of daughter cells born from tetraploid mitoses when tetraploids were treated with the indicated siRNA/miRNA. (C) Table identifying all miRNA hits with an AAGUGC seed motif (red text) and the signaling pathways each miRNA hit modulates. (D) Western blot analysis of RPE-1 cells, transfected with the indicated siRNA/miRNA and serum starved for 24 h (left) prior to 1 h restimulation with 5% fetal bovine serum (right). (E)Quantification of (D).

**Supplemental Figure 2:** (A) Western blot analysis of RPE-1 cells, transfected with the indicated siRNA/miRNA after treatment with 100 ng/mL doxorubicin for 4 h. miRNAs found to reduce p21 levels more than 40% relative to controls are colored red. (B) Quantification of (A). p21 levels are normalized to doxorubicin treated miR-NC cells (n=2, \*  $p < 0.05$ , \*\*  $p < 0.01$ , \*\*\*  $p < 0.001$ , \*\*\*\*  $p < 0.0001$ , two-tailed t test).(C, D)Western blot analysis of tetraploid RPE-1 cells treated with the indicated siRNA/miRNA for 48 h (top), with corresponding quantitation (bottom) (n=2, two-tailed t test).(E) Relative localization of YAP in representative images of tetraploid RPE-1 cells following transfection with the indicated siRNA/miRNA (bottom). Plot depicts the normalized ratio of YAP immunofluorescence intensity in the nucleus:cytoplasm (N/C) performed in technical duplicate (n >100 cells/condition, two-tailed t test).

**Supplemental Figure 3:** (A)Representative fixed immunofluorescence images of YAP (green) in RPE-1 cells transfected with the indicated siRNA/miRNA for 48 h.

**(B)** Representative fixed images of YAP in HEK293A cells transfected with the indicated siRNA/miRNA for 48 h (n = 3, >200 cells/condition) **(C)** Quantification of the normalized ratio of YAP immunofluorescence intensity in the nucleus:cytoplasm from (B) (3 independent experiments, n > 200 cells/condition, \*\*\*\* p ≤ 0.0001, one-way ANOVA). **(D)** Western blot analysis of RPE-1 cells transfected with either negative control or miR-24-3p after 48 h. **(E)** Heat map of top 50 most downregulated genes, according to t-test, in RPE-1 cells overexpressing miR-24-3p with *NF2* highlighted in green. Created using Morpheus matrix visualization software by the Broad Institute (<https://software.broadinstitute.org/morpheus/>).

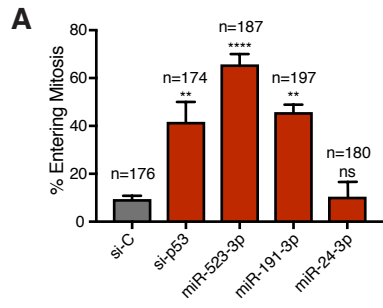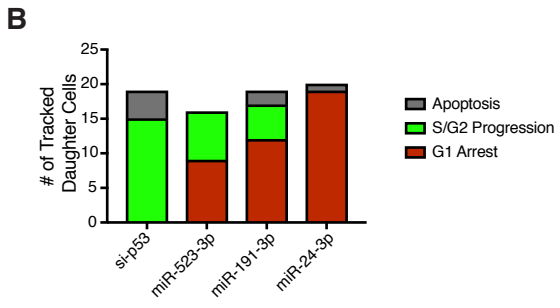

**C**

| Ambion ID       | Human ID        | Sequence                | Activates |     | Inactivates |       |
|-----------------|-----------------|-------------------------|-----------|-----|-------------|-------|
|                 |                 |                         | Mitogenic | p21 | Hippo       | Hippo |
| hsa-miR-523     | hsa-miR-523-3p  | GAACGCGCUUCCCUAAGAGGGU  | ✓         | ✓   | ✓           | ✓     |
| hsa-miR-191*    | hsa-miR-191-3p  | GCUGCGCUUGAUUCUGCCCC    | ✓         | ✓   | ✓           | ✓     |
| hsa-miR-372     | hsa-miR-372-3p  | AAAGUGUCGACAUUUGAGCGU   | NT        | NT  | NT          | NT    |
| mmu-miR-302a    | hsa-miR-302a-3p | UAAGUGCUUCAUGUUUGUGUGA  | ✓         | ✓   | ✓           | ✓     |
| hsa-miR-767-5p  | hsa-miR-767-5p  | UGCACCAUGUGUUGUGAGCAUG  | NT        | NT  | NT          | NT    |
| hsa-miR-520c-3p | hsa-miR-520c-3p | AAAGUGCUUCCUUUAGAGGGU   | NT        | NT  | NT          | NT    |
| hsa-miR-302b    | hsa-miR-302b-3p | UAAGUGCUUCAUGUUUAGUAG   | ✓         | ✓   | ✓           | ✓     |
| hsa-miR-302e    | hsa-miR-302e    | UAAGUGCUUCAUGUUU        | NT        | NT  | NT          | NT    |
| xtr-miR-148b    | hsa-miR-148b-3p | UCAGUGCAUCAAGACUUUGU    | ✓         | ✓   | ✓           | ✓     |
| bla-miR-24      | hsa-miR-24-3p   | UGGCUCAGUUCAGCAGGAACAG  | ✓         | ✓   | ✓           | ✓     |
| hsa-miR-520b    | hsa-miR-520b    | AAAGUGCUUCCUUUAGAGGG    | NT        | NT  | NT          | NT    |
| hsa-miR-520a-3p | hsa-miR-520a-3p | AAAGUGCUUCCUUUGGACUGU   | NT        | NT  | NT          | NT    |
| hsa-miR-302d    | hsa-miR-302d-3p | UAAGUGCUUCAUGUUUGAGUGU  | ✓         | ✓   | ✓           | ✓     |
| hsa-miR-520e    | hsa-miR-520e    | AAAGUGCUUCCUUUUGAGGG    | NT        | NT  | NT          | NT    |
| hsa-miR-520d-3p | hsa-miR-520d-3p | AAAGUGCUUCUUUGUGGGU     | NT        | NT  | NT          | NT    |
| gga-miR-302c    | hsa-miR-302c-3p | UAAGUGCUUCAUGUUUCAGUGG  | NT        | NT  | NT          | NT    |
| hsa-miR-32      | hsa-miR-32-5p   | UAUUGCACAUUACUUAAGUUGCA | NT        | NT  | NT          | NT    |
| hsa-miR-298     | hsa-miR-298     | AGCAGAAGCAGGAGGUUCUCCCA | NT        | ✓   | NT          | NT    |
| rno-miR-874     | hsa-miR-874-3p  | CUGCCUCCGCCAGGACCAGA    | NT        | NT  | NT          | NT    |
| mmu-miR-200a*   | hsa-miR-200a-5p | CAUUCUACCGACAGUCUGGA    | NT        | NT  | NT          | NT    |
| hsa-miR-520g    | hsa-miR-520g-3p | ACAAGUGCUUCCUUUAGAGUGU  | NT        | ✓   | NT          | NT    |
| hsa-miR-553     | hsa-miR-553     | AAAACGUGAGAUUUUGUUUU    | NT        | NT  | ✓           | NT    |
| hsa-miR-517b    | hsa-miR-517b    | UCUGCAUCCUUUAGAGUGUU    | NT        | NT  | NT          | NT    |

✓ Modulates Pathway  
 - No Appreciable Modulation  
 NT Not Tested

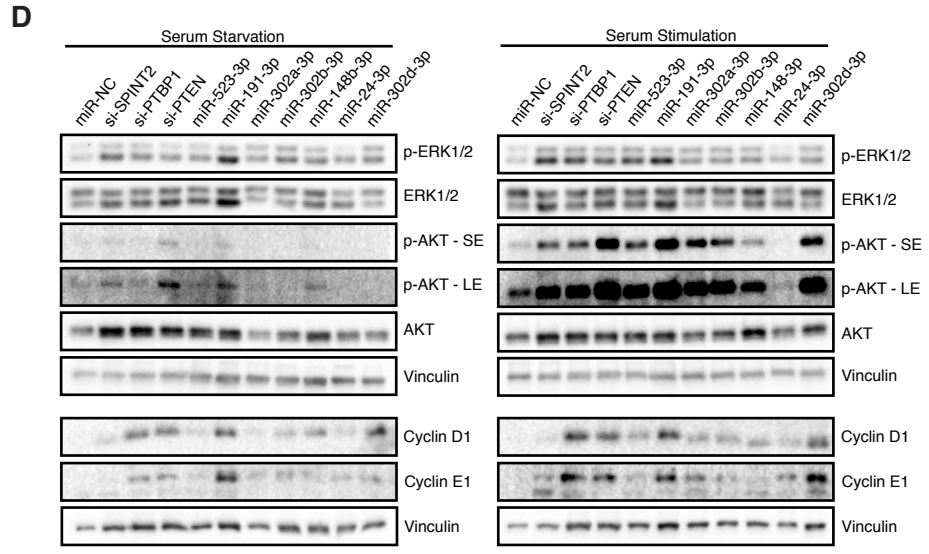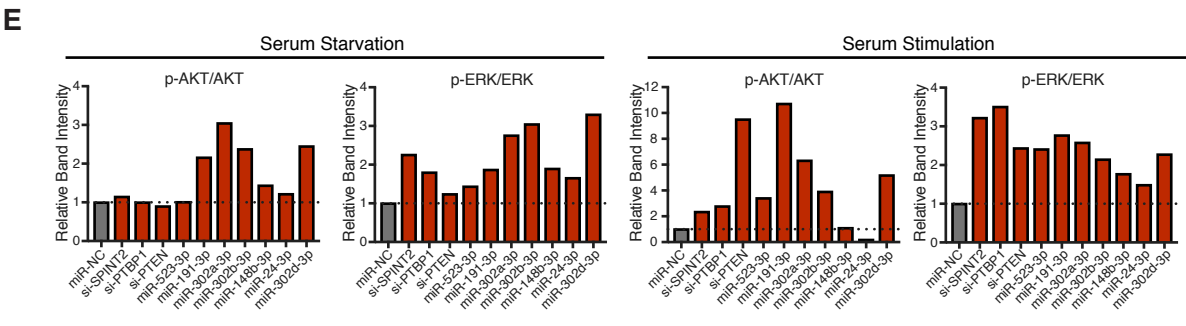

**A**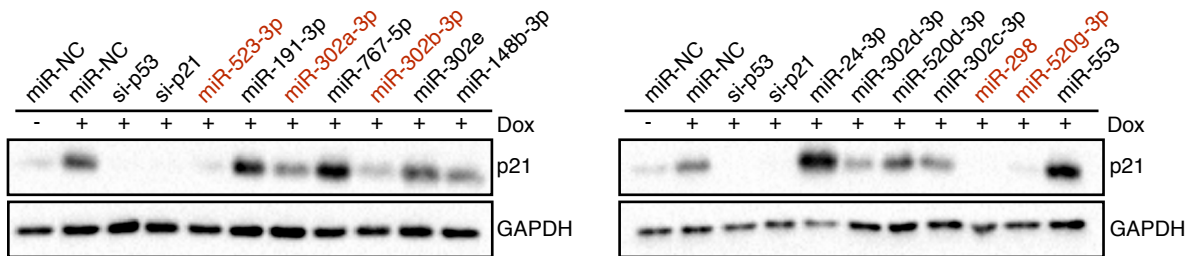**B**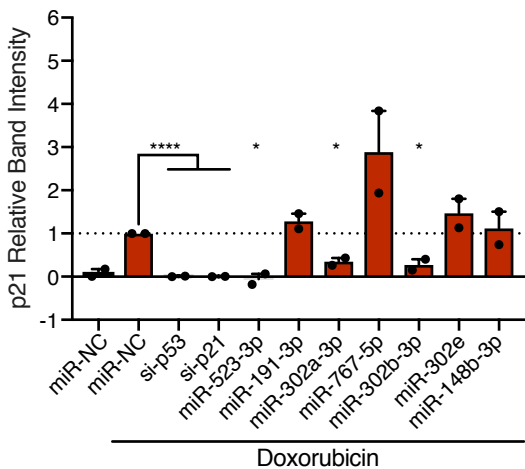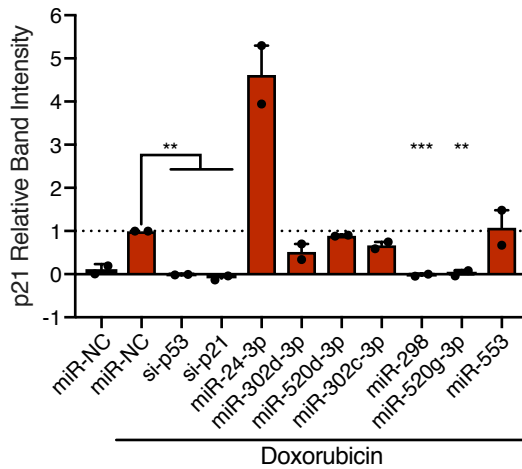**C**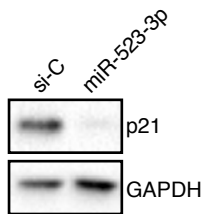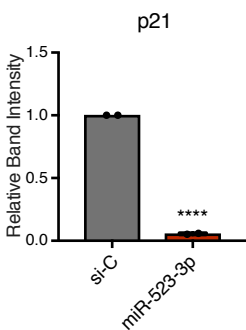**D**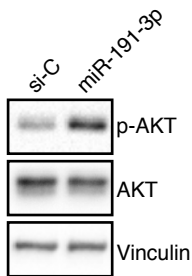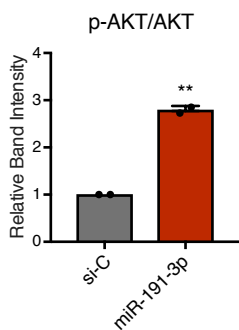**E**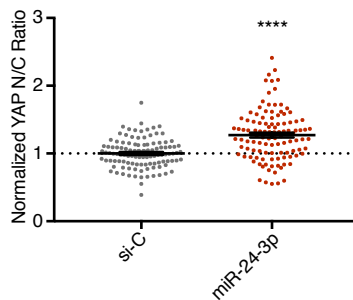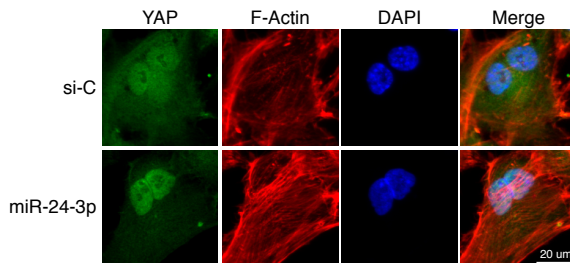

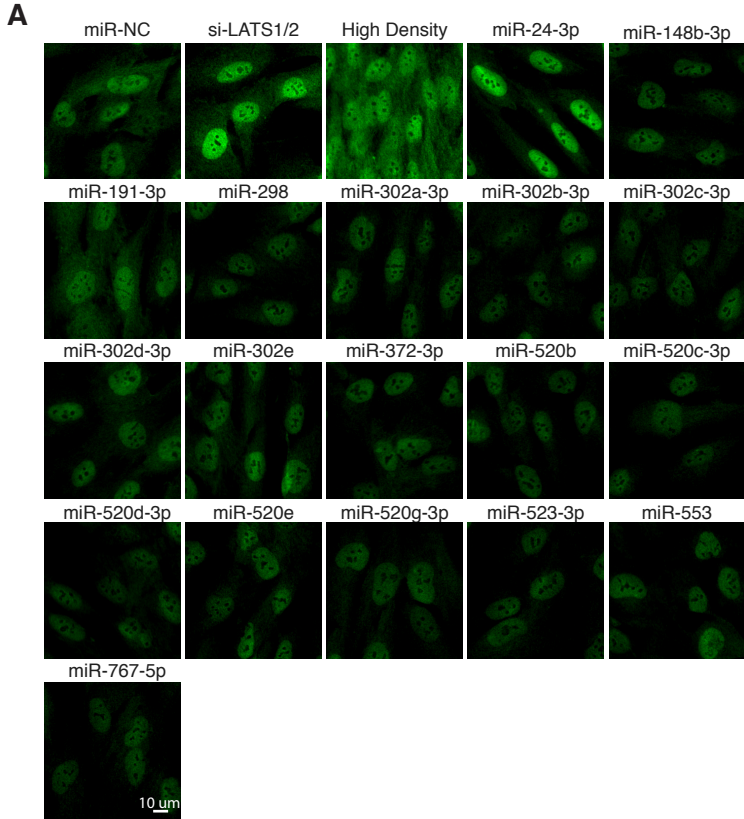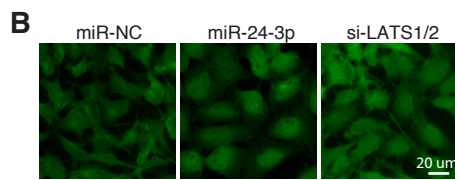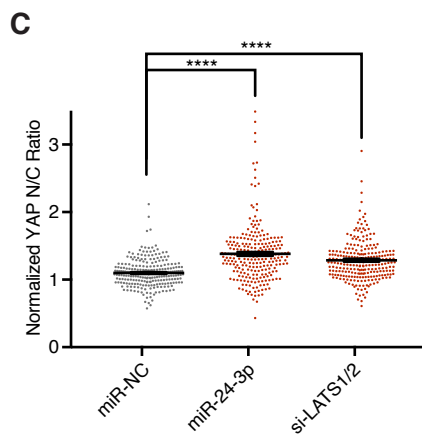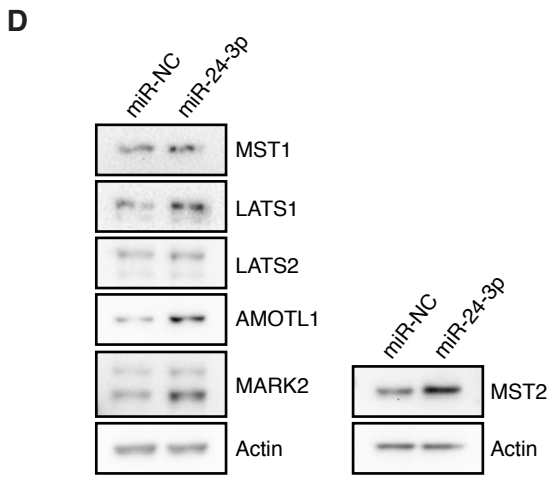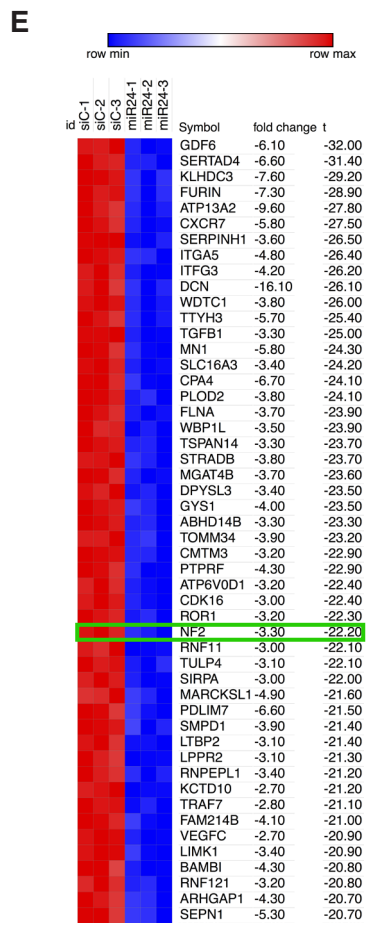

Supplement: mbc-29-1682-s001.pdf [file mbc-29-1682-s001.pdf]
